# Supplementary material
Source: PubMed Central journal article supplement (PMC10992889)

# Suppl Fig 1

## a CD8+ T cell response in patient #5

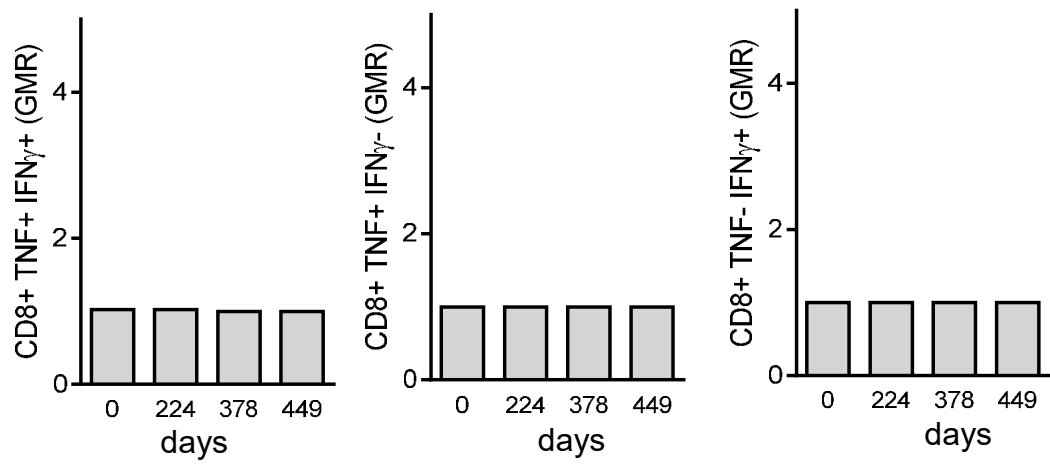

## b

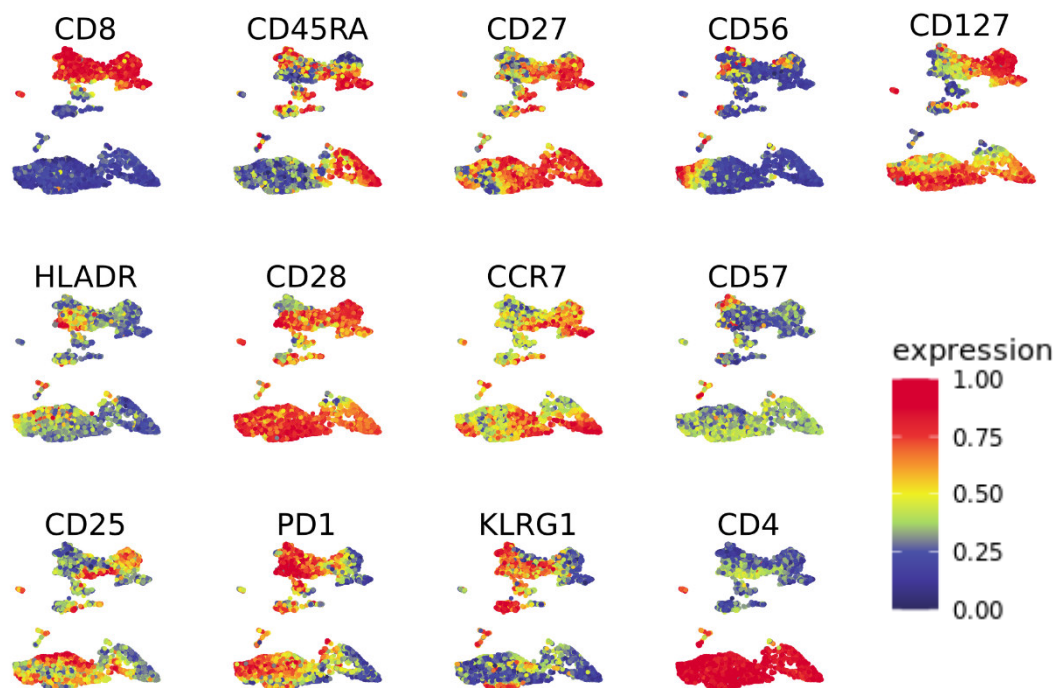

# Suppl Fig 2

## a T cell cytokine profile in patient #5

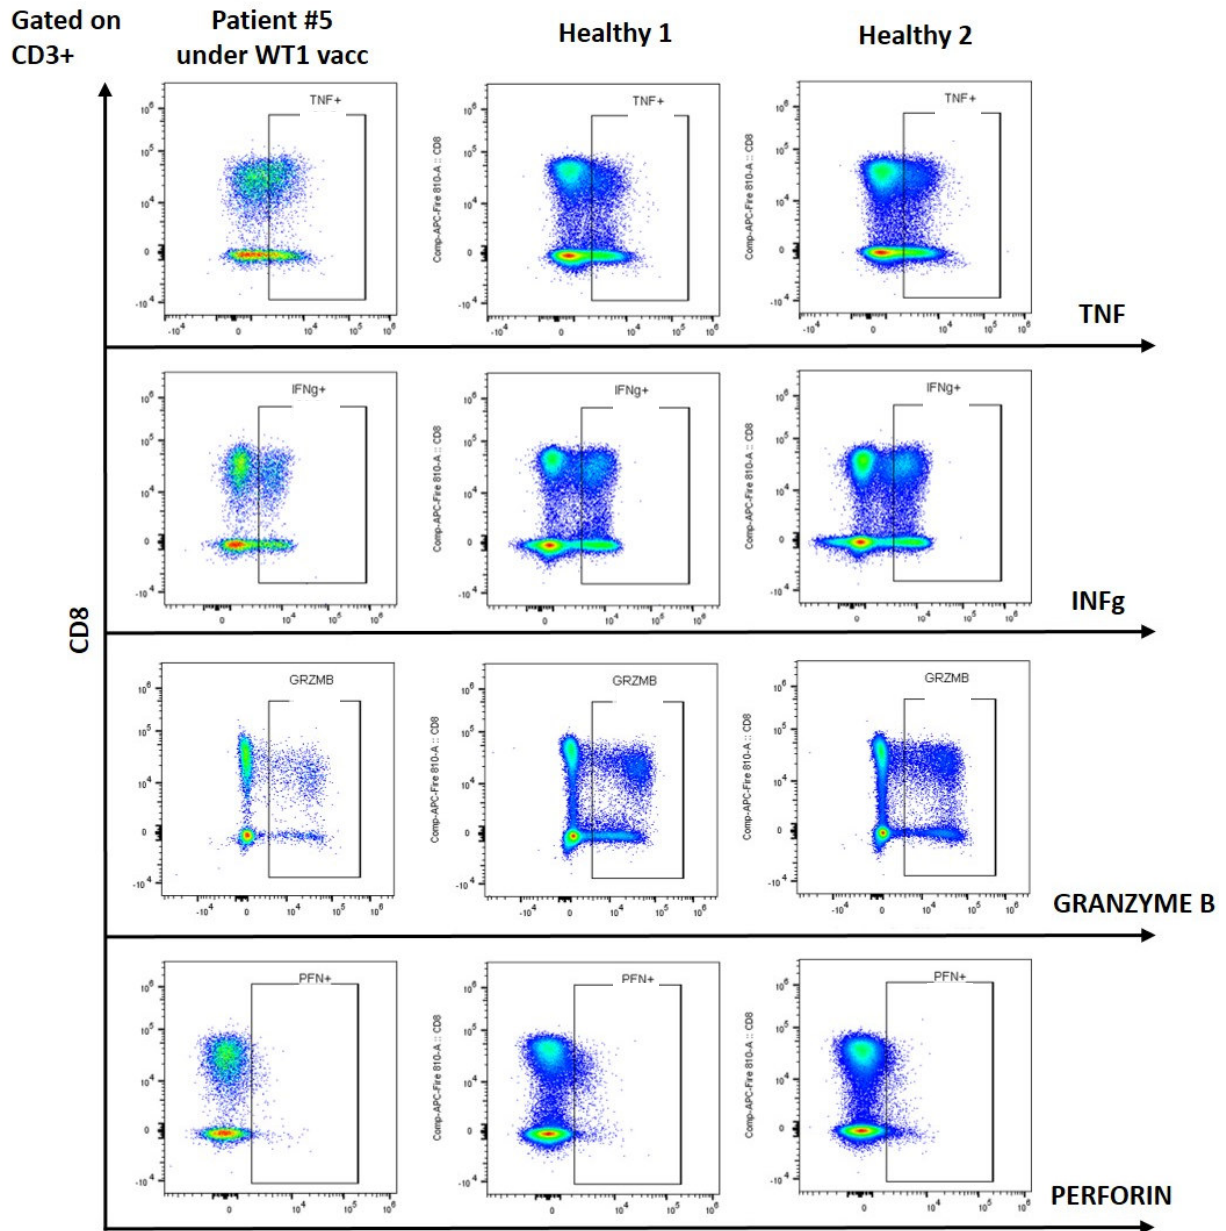

# Suppl Fig 3

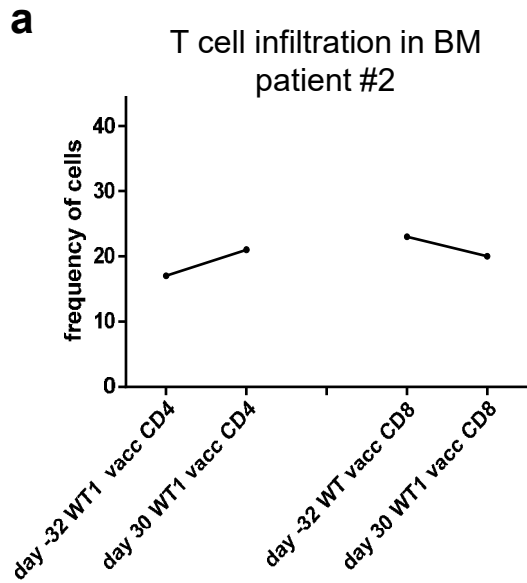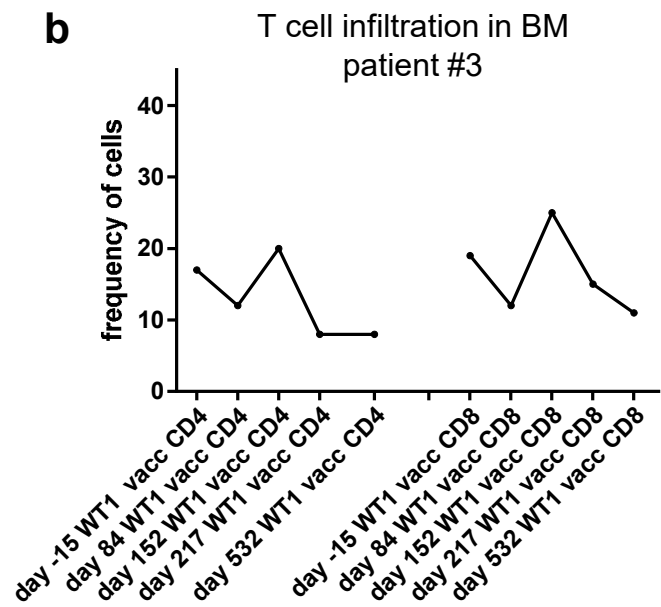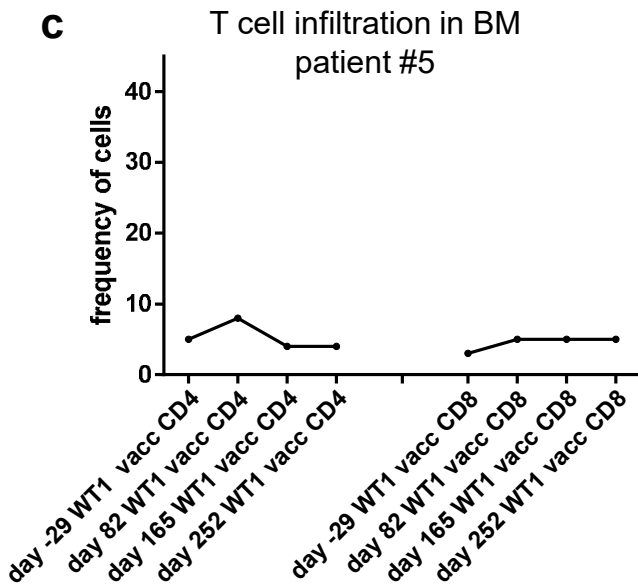

Supplement: 262_2022_3202_MOESM1_ESM.pdf [file 262_2022_3202_MOESM1_ESM.pdf]
