# Supplementary material
Source: PubMed Central journal article supplement (PMC10992889)
Supplement: 262_2022_3202_MOESM2_ESM.pdf [file 262_2022_3202_MOESM2_ESM.pdf]

**Suppl Table 1 Humoral response: anti-WT1 IgG (EU/ml)**

| Pat. No. | Prior to vacc. | After 2 vacc. / week 5 | After 4 vacc. / week 9 | After 6 vacc. / week 13 | After 6 vacc. / week 15 | After 8 vacc. / week 21 | After 12 vacc. / week 32 | After 13 vacc./ week 40 | After 16 vacc. / week 54 | After 17 vacc. / week 64 | 4 months after last vacc. |
|----------|----------------|------------------------|------------------------|-------------------------|-------------------------|-------------------------|--------------------------|-------------------------|--------------------------|--------------------------|---------------------------|
| 1        | <7             | <7                     |                        |                         |                         |                         |                          |                         |                          |                          |                           |
| 2        | <7             | <7                     |                        |                         |                         |                         |                          |                         |                          |                          | <7                        |
| 3        | <7             | <7                     | 26                     | 58                      | 50                      | 46                      |                          |                         |                          |                          |                           |
| 4        | <7             | <7                     |                        |                         |                         |                         |                          |                         |                          |                          |                           |
| 5        | <7             | <7                     | <7                     | <7                      |                         | <7                      | <7                       | <7                      | <7                       | <7                       |                           |

## Suppl Table 2 High-dimensional cytometry – surface staining

| Fluorochrome    | Antigen       | Clone    | Company          |
|-----------------|---------------|----------|------------------|
| BUV395          | CD45RA        | HI100    | BD               |
| BUV563          | CD27          | M-T271   | BD               |
| BUV737          | CD56          | NCAM16.2 | BD               |
| BUV805          | CD3           | UCHT1    | BD               |
| BV510           | CD3           | OKT3     | Biolegend        |
| BV570           | HLA-DR        | L243     | Biolegend        |
| BV605           | CD28          | CD28.2   | Biolegend        |
| BV785           | CCR7 (CD197)  | G043H7   | Biolegend        |
| FITC            | CD57          | HNK-1    | Biolegend        |
| Spark Blue      | CD4           | SK3      | Biolegend        |
| PerCP           | CD45          | 2D1      | Biolegend        |
| PerCP-eFluor710 | KLRG1         | 13F12F2  | ThermoScientific |
| PE-Cy5.5        | CD19          | SJ25C1   | ThermoScientific |
| PE/Dazzle594    | PD-1          | EH12.2H7 | Biolegend        |
| PE-Cy7          | CD25 (IL-2Ra) | M-A251   | Biolegend        |
| Spark NIR 685   | CD127         | A019D5   | Biolegend        |
| APC/Fire810     | CD8           | SK1      | Biolegend        |

### Suppl Table 3 High-dimensional cytometry – intracellular staining

| Fluorochrome | Antigen    | Clone | Company   |
|--------------|------------|-------|-----------|
| V450         | IFNg       | B27   | BD        |
| BV750        | TNF        | Mab11 | BD        |
| PerCP-Cy5.5  | Perforin   | B-D48 | Biolegend |
| AF700        | Granzyme B | GB11  | BD        |
